# Supplementary material for: Efficacy of early rituximab treatment in anti-mGluR1 encephalitis: A case report
Source: Research Square preprint supplement (doi:10.21203/rs.3.rs-5635966/v1), 2025-03-27
Supplement: Supplementary file 1 [file 84a6b6489617e217ae6c3fc9.xlsx]

## Sheet: Sheet1
			case	age	sex	number of times	mRS or SARA(peak of disiease)	mRS or SARA (after treatment)	relapse	outcome	cerebellar atrophy	follow up (Month)	retested antibody titer
			13)	29	M	NA	4 (mRS), 36 (SARA)	4 (mRS), 36 (SARA)	None	No improvement	(+)	55	NA
			23)	22	F	NA	4 (mRS), 18 (SARA)	2 (mRS), 9 (SARA)	None	Significant improvement	(-)	12	NA
			33)	45	F	NA	2 (mRS), 17 (SARA)	1 (mRS), 6 (SARA)	None	Significant improvement	(+)	20	NA
			412)	22	F	2	5 (mRS)	1 (mRS)	None	Significant improvement	NA	12	NA
			511)	45	M	3	NA	NA	1a	Improvement	(-)	24	Decrease in serum (from 1000-fold to 320-fold)
			613)	39	F	NA	5 (mRS), 34 (SARA)	4 (mRS), 24 (SARA)	None	Partial improvement	(+)	46	NA
			75)	51	F	1	15 (SARA)	9 (SARA)	3	Partial improvement	(+)	67	Decrease in serum (from 3200-fold to 100-fold)
			88)	64	M	NA	NA	NA	1b	Improvement	NA	17	NA
			98)	77	F	NA	NA	NA	None	No improvement	NA	4	NA
			109)	56	F	NA	NA	1 (mRS)	1	Improvement	(+)	61	No change
			Our caes	65	F	4	4 (mRS), 24 (SARA)	1 (mRS), 9 (SARA)	None	Significant improvement	(-)	6	Increase in serum (from 200-fold to 400-fold) and decrease in CSF (from 10-fold to 5-fold)
